# Supplementary material
Source: publisher figshare collection journal article supplement (https://acs.figshare.com/ndownloader/files/12272897)
Supplement: Supplementary file 1 [file 12272897]

# Supporting Information

## Boosting Perovskite Light-Emitting-Diodes Performance via

### Tailoring Interfacial Contact

*Yatao Zou<sup>1‡</sup>, Muyang Ban<sup>1‡</sup>, Yingguo Yang<sup>2</sup>, Sai Bai<sup>3</sup>, Chen Wu<sup>1</sup>, Yujie Han<sup>1</sup>, Tian Wu<sup>1</sup>, Yeshe Tan<sup>1</sup>, Qi Huang<sup>1</sup>, Xingyu Gao<sup>2</sup>, Tao Song<sup>1\*</sup>, Qiao Zhang<sup>1\*</sup>, and Baoquan Sun<sup>1\*</sup>*

<sup>1</sup>Jiangsu Key Laboratory for Carbon-Based Functional Materials & Devices, Institute of Functional Nano & Soft Materials (FUNSOM) and Collaborative Innovation Center of Suzhou Nano Science and Technology, Soochow University, 199 Ren'ai Road, Suzhou 215123, People's Republic of China

<sup>2</sup>Shanghai Synchrotron Radiation Facility (SSRF), Shanghai Institute of Applied Physics, Chinese Academy of Sciences, 239 Zhangheng Road, Pudong New Area, Shanghai 201204, China

<sup>3</sup>Department of Physics, Chemistry and Biology (IFM), Linköping University, SE-581 83 Linköping, Sweden

\*Corresponding Author: [tsong@suda.edu.cn](mailto:tsong@suda.edu.cn); [qiaozhang@suda.edu.cn](mailto:qiaozhang@suda.edu.cn); [bqsun@suda.edu.cn](mailto:bqsun@suda.edu.cn).

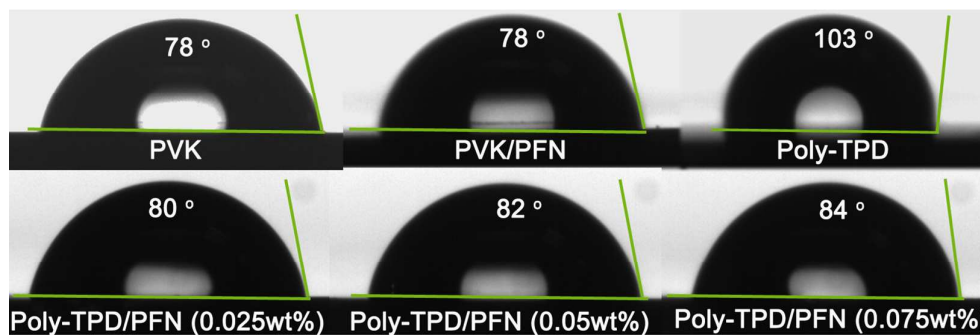

**Figure S1** Water contact angle images on PVK, PVK/PFN, poly-TPD, and poly-TPD/PFN with different PFN concentration. Contact angle values are depicted in each image.

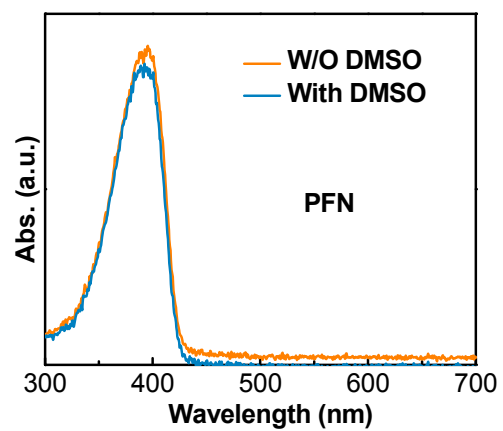

**Figure S2.** UV-vis absorption spectra of PFN layer before and after DMSO spin coating.

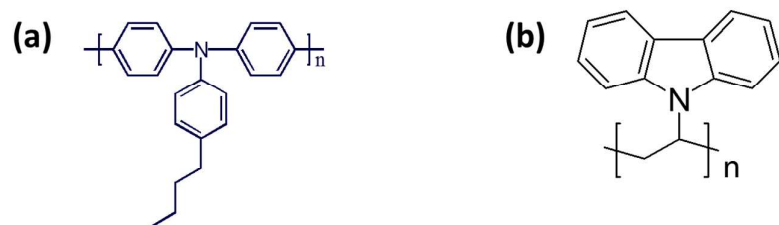

**Figure S3** Molecular structures of (a) Poly-TPD, (b) PVK.

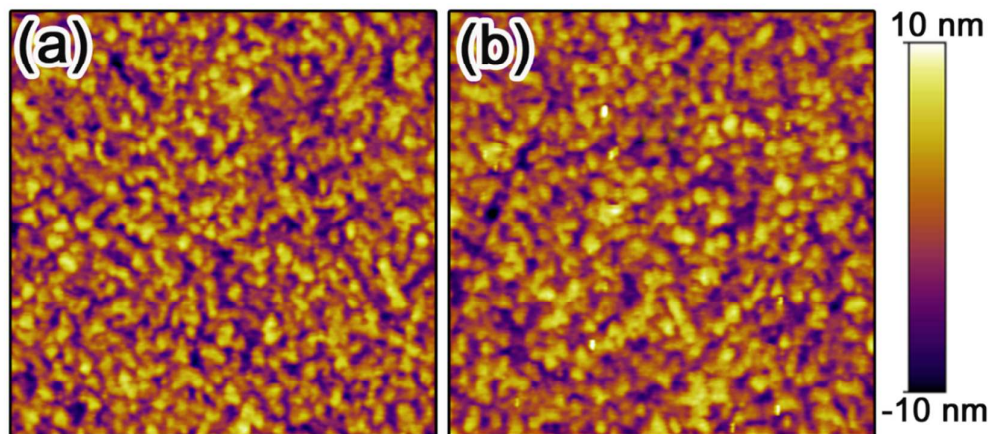

**Figure S4** AFM height topography images of poly-TPD films covered (a) without and (b) with PFN coating layer. The RMS values for pristine poly-TPD and poly-TPD/PFN are exactly same with values of  $\sim 1.1$  nm. The AFM images are  $2\ \mu\text{m} \times 2\ \mu\text{m}$ .

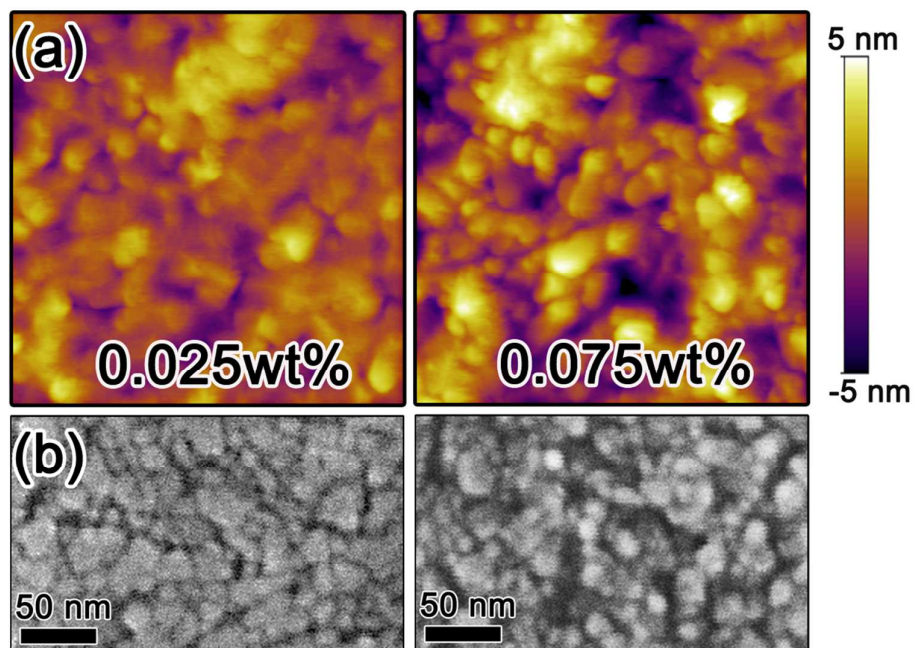

**Figure S5** (a) AFM, (b) SEM height topography image of perovskite on poly-TPD/PFN with different PFN concentration. All AFM image sizes are 500 nm×500 nm.

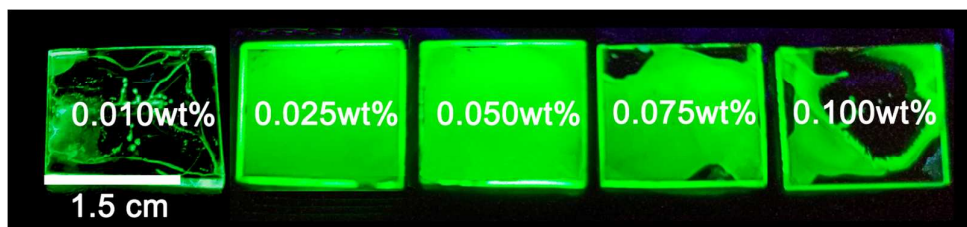

**Figure S6** Photographs of perovskite morphologies deposited on poly-TPD/PFN with different PFN concentration under 365 nm UV light illumination. PFN with concentration from 0.010wt% to 0.100wt% (from left to right).

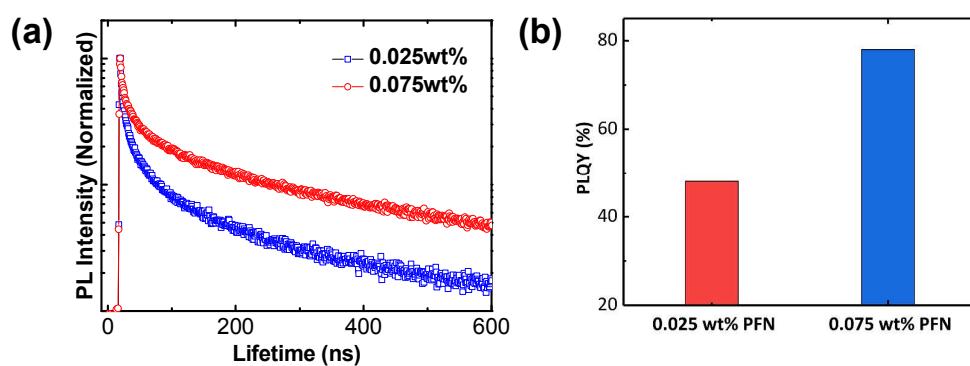

**Figure S7** (a) PL lifetime and (b) PLQY characteristics of perovskite films on poly-TPD/PFN with different PFN concentration.



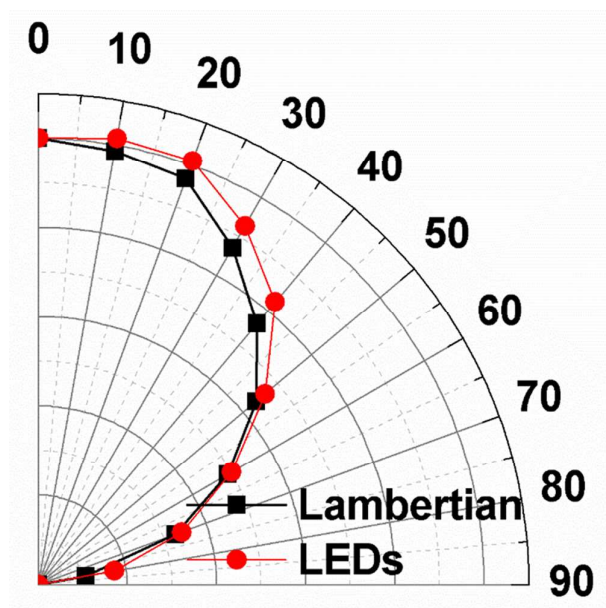

**Figure S8** EL emission angle distribution profile of perovskite LEDs devices compared to the standard Lambertian one.

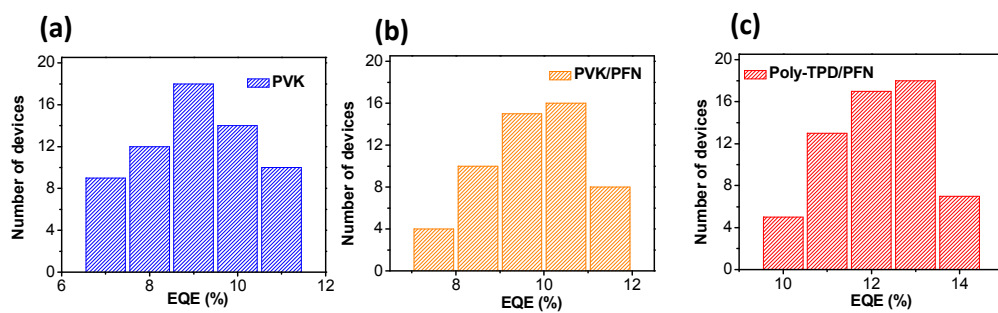

**Figure S9** EQE histogram of ~60 LEDs fabricated on different HTLs. (a) PVK. (b) PVK/PFN. (c) Poly-TPD/PFN. The PFN concentration is 0.050wt%.

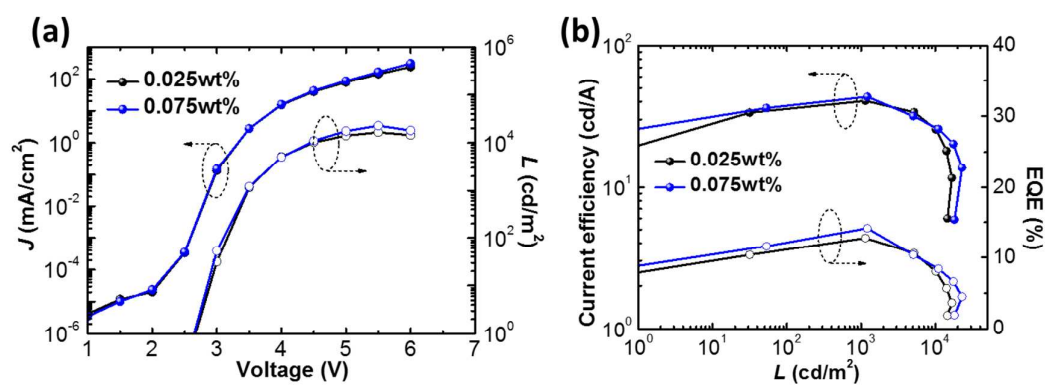

**Figure S10** Electrical output characteristics of the devices based on poly-TPD/PFN HTLs with different PFN thickness. (a) J-V-L characterization; (b) Current efficiency-L-EQE curve.

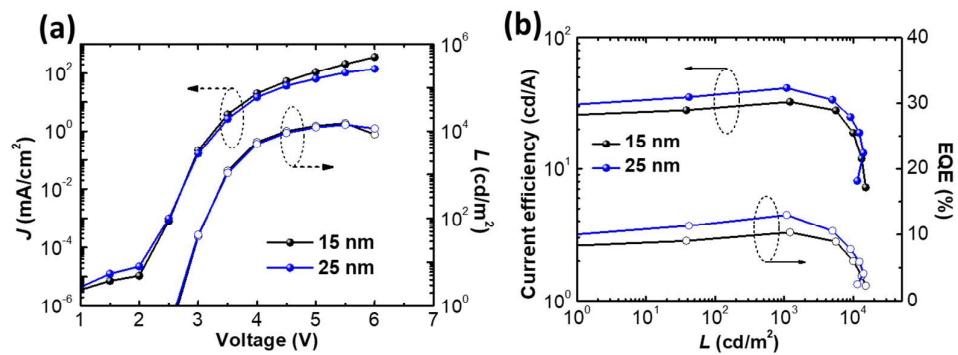

**Figure S11** Electrical output characteristics of the devices based on poly-TPD/PFN (0.050wt%) with different TPBi thickness. (a) J-V-L characterization; (b) Current efficiency-L-EQE curve.

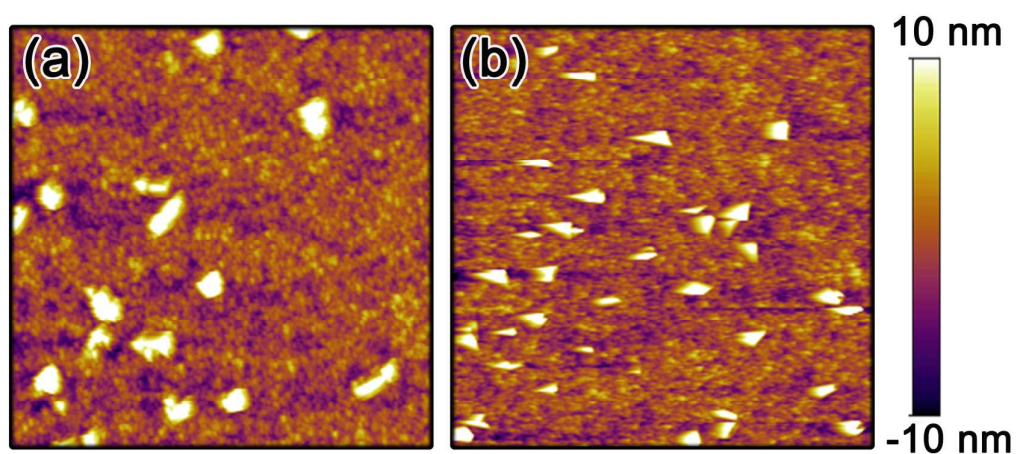

**Figure S12.** AFM height images of perovskite films deposited from the precursor solution with extra PFN (0.02 mg/mL) on (a) PVK (b) poly-TPD/PFN. Here, poly-TPD/PFN layer is deposited by a PFN concentration of 0.050wt%. All AFM sizes are 5 μm×5 μm.

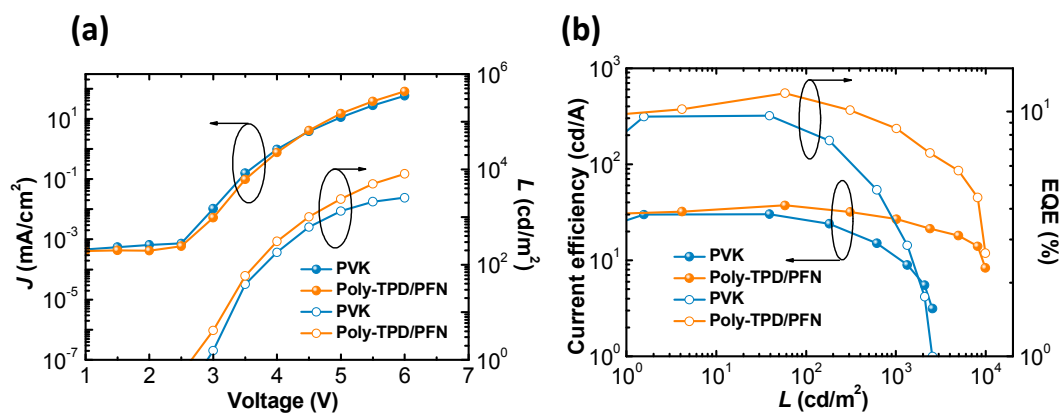

**Figure S13.** Electrical outputs of LED devices fabricated with PFN in the perovskite precursor solution on PVK or poly-TPD/PFN as HTL. (a) J-V-L curve. (b) CE-L-EQE curve.

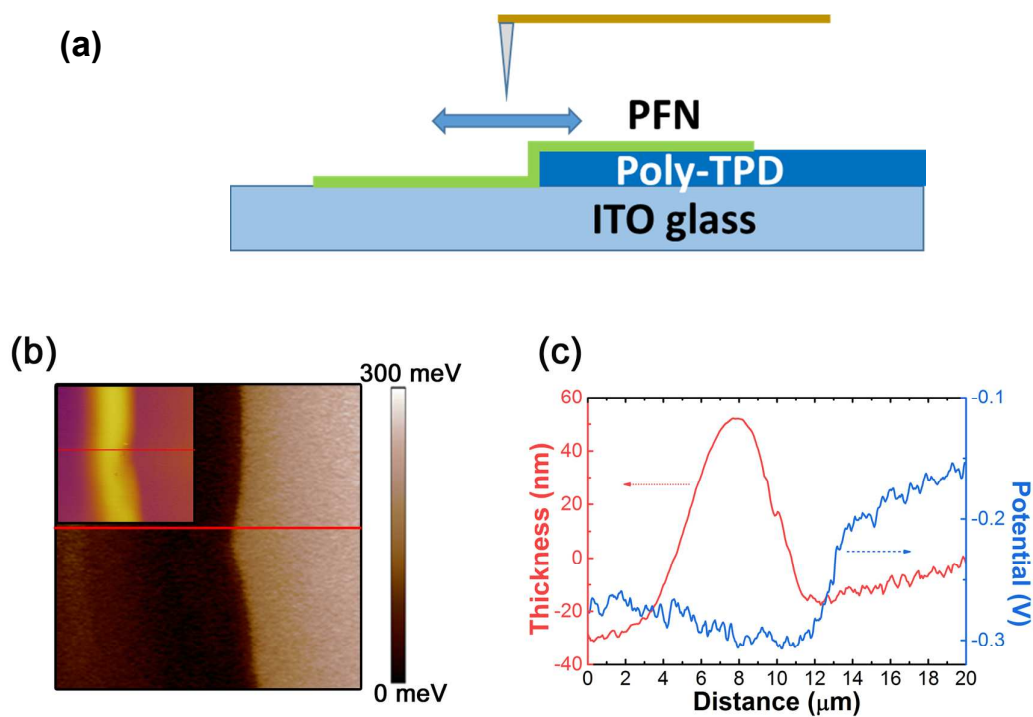

**Figure S14** (a) Schematic illustration of experimental set-up for surface potential of ITO/poly-TPD/PFN interlayer probed by SKPM. A ~30-nm-thick poly-TPD layer is deposited on half-side ITO glass, and then completely covered a thin PFN layer to form a distinct interface. (b) SKPM profile of ITO/poly-TPD/PFN interface. Inset shows the height image of the corresponding image. The AFM image size is 20 μm by 20 μm. (c) Cross-section line profile of height and surface potential images in (b).

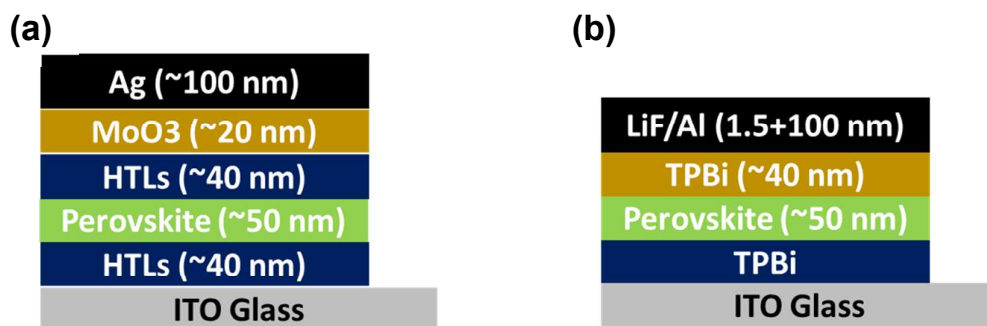

**Figure S15** Single carrier device structure of (a) hole-only device and (b) electron-only device. Here, the HTLs are PVK, PVK/PFN, and poly-TPD/PFN. The PFN concentration is 0.05wt%.



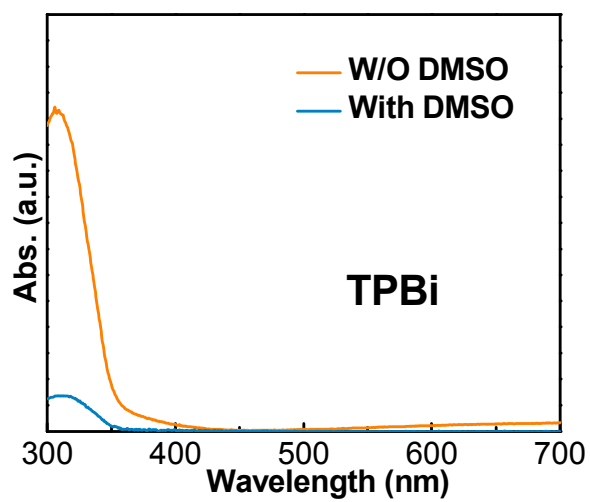

**Figure S16.** UV-vis absorption spectra of a ~200 nm-thick-TPBi layer with and without quick DMSO washing.

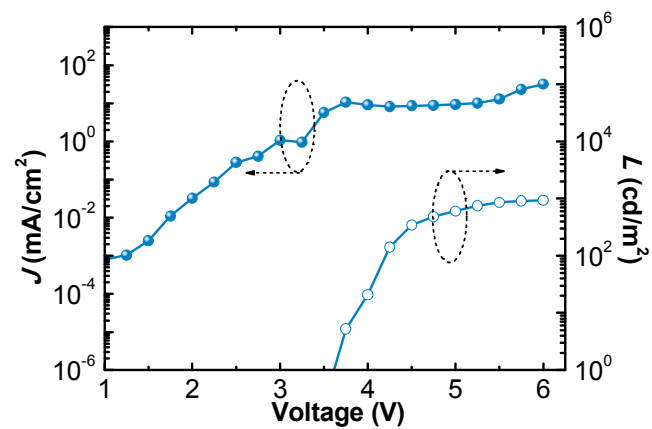

**Figure S17.** J-V-L curve of device with structure of ITO/perovskite (~50 nm)/TPBi (~20 nm)/LiF (~1.5 nm)/Al (~100 nm).

**Table S1** Summarized PL lifetime of perovskite deposited on poly-TPD/PFN, where PFN concentration are 0, 0.025wt%, 0.050wt% and 0.075wt%, respectively.

| PFN<br>concentration<br>(wt%) | $\tau_1$ (ns) | $\tau_2$ (ns) | $\tau_3$ (ns) | $\tau_{\text{average}}$ (ns) |
|-------------------------------|---------------|---------------|---------------|------------------------------|
| <b>0</b>                      | 67.8          | 446.8         | 7.6           | 37.8                         |
| <b>0.025</b>                  | 79.7          | 486.8         | 8.3           | 53.7                         |
| <b>0.050</b>                  | 89.6          | 510.7         | 9.4           | 65.3                         |
| <b>0.075</b>                  | 116.5         | 600.1         | 11.2          | 121.6                        |

**Table S2** Electrical output characteristics of the devices based on poly-TPD/PFN as HTL with different PFN concentration. Here, the thickness of poly-TPD is ~45 nm.

| PFN concentration (wt%) | $L_{\max}$ (cd m <sup>-2</sup> ) | $\eta_p$ (lm W <sup>-1</sup> ) | $\eta_A$ (cd A <sup>-1</sup> ) | EQE (%)     |
|-------------------------|----------------------------------|--------------------------------|--------------------------------|-------------|
| <b>0.025</b>            | 16690                            | 36.4                           | 40.5                           | <b>12.8</b> |
| <b>0.075</b>            | 22790                            | 38.8                           | 43.2                           | <b>13.8</b> |

**Table S3** Electrical output characteristics of the devices based on poly-TPD/PFN with different thickness of TPBi. Here, the thickness of poly-TPD is ~45 nm and the PFN concentration is 0.050wt%.

| TPBi thickness (nm) | $L_{\max}$ (cd m <sup>-2</sup> ) | $\eta_p$ (lm W <sup>-1</sup> ) | $\eta_A$ (cd A <sup>-1</sup> ) | EQE (%)      |
|---------------------|----------------------------------|--------------------------------|--------------------------------|--------------|
| <b>15</b>           | 15120                            | 29.11                          | 32.43                          | <b>10.34</b> |
| <b>25</b>           | 13980                            | 37.10                          | 41.33                          | <b>13.01</b> |
